# Supplementary material for: Optical fiber-based on-line UV/Vis spectroscopic monitoring of chemical reaction kinetics under high pressure in a capillary microreactor
Source: Royal Society of Chemistry journal article supplement (doi:10.1039/b500429b), 2005-01-01
Supplement: b500429b.pdf [file b500429b.pdf]

## Supplementary information

# Optical fiber-based on-line UV/Vis spectroscopic monitoring of chemical reaction kinetics under high pressure in a capillary microreactor

**Fernando Benito-Lopez,<sup>a</sup> Willem Verboom, <sup>\*a</sup> Masaya Kakuta,<sup>b</sup> J. (Han) G. E. Gardeniers,  
<sup>\*b</sup> Richard J. M. Egberink,<sup>a</sup> Edwin R. Oosterbroek,<sup>b</sup> Albert van den Berg<sup>b</sup> and David N.  
Reinhoudt<sup>a</sup>**

<sup>a</sup>Laboratory of Supramolecular Chemistry and Technology (SMCT), MESA<sup>+</sup> Institute for Nanotechnology, University of Twente, P.O. Box 217, 7500 AE, Enschede, The Netherlands. E-mail: [w.verboom@utwente.nl](mailto:w.verboom@utwente.nl); Fax: +31 (0)53 489 4645; Tel: +31 (0)53 489 2977

<sup>b</sup>BIOS-Lab-on-a-chip group, MESA<sup>+</sup> Institute for Nanotechnology, University of Twente, P.O. Box 217, 7500 AE, Enschede, The Netherlands. E-mail: [j.g.e.gardeniers@utwente.nl](mailto:j.g.e.gardeniers@utwente.nl); Fax: +31 (0)53 489 2287; Tel: +31 (0)53 489 4356

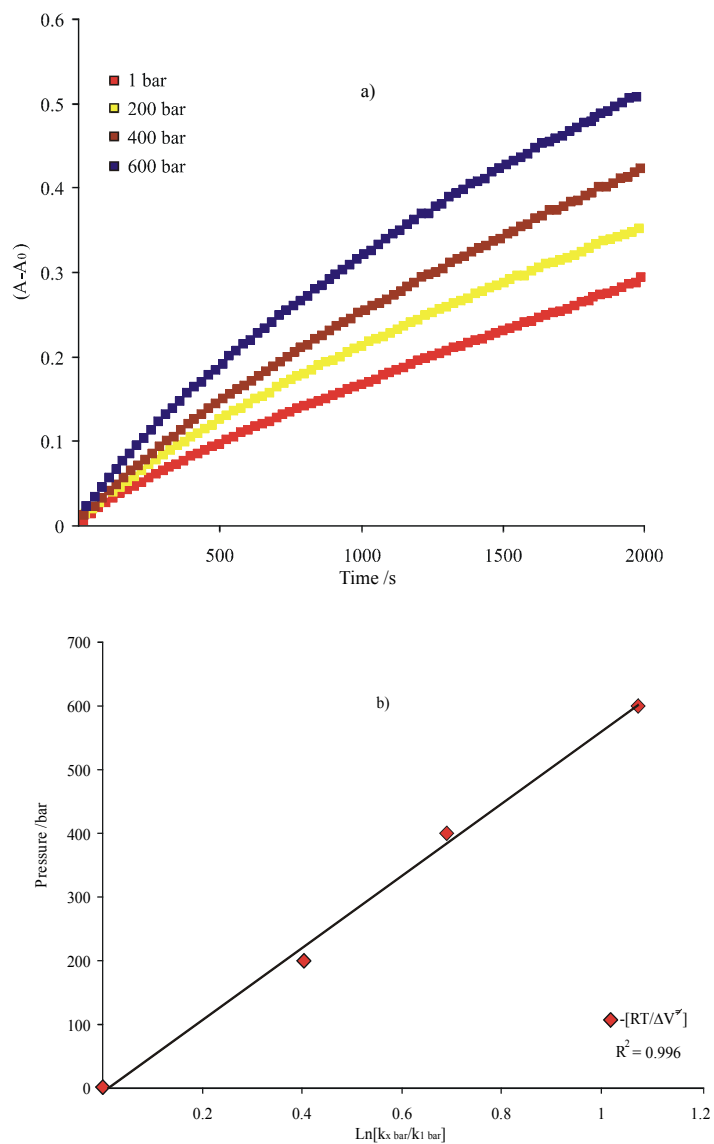

Fig. 1 a) Plot of the change of the absorbance at 391 nm versus time (10 sec intervals) for the product **3b** formation of the reaction of 1-chloro-4-nitrobenzene (**1b**) with pyrrolidine (**2a**) under different pressures (1-600 bar). b) Plot of the pressure versus the logarithm of the rate constants for the same reaction to calculate  $\Delta V^\ddagger$  using eqn. 2.

**Table 1** Rate constants for the nucleophilic aromatic substitution reaction of halonitrobenzenes **1** with amines **2**.

| <b>1</b> <sup>a</sup> | <b>2</b> <sup>a</sup> | P /bar | $k_{\text{obs}} / \text{s}^{-1}$ | $k / \text{M}^{-1} \text{s}^{-1}$ |
|-----------------------|-----------------------|--------|----------------------------------|-----------------------------------|
| <b>1a</b>             | <b>2a</b>             | 1      | $1.40 \times 10^{-02}$           | $1.12 \times 10^{-02}$            |
|                       |                       | 100    | $1.78 \times 10^{-02}$           | $1.42 \times 10^{-02}$            |
|                       |                       | 320    | $3.24 \times 10^{-02}$           | $2.59 \times 10^{-02}$            |
|                       |                       | 440    | $3.86 \times 10^{-02}$           | $3.09 \times 10^{-02}$            |
| <b>1b</b>             | <b>2a</b>             | 1      | $2.47 \times 10^{-04}$           | $1.97 \times 10^{-04}$            |
|                       |                       | 200    | $3.50 \times 10^{-04}$           | $2.80 \times 10^{-04}$            |
|                       |                       | 400    | $4.89 \times 10^{-04}$           | $3.92 \times 10^{-04}$            |
|                       |                       | 600    | $6.95 \times 10^{-04}$           | $5.56 \times 10^{-04}$            |
| <b>1c</b>             | <b>2a</b>             | 1      | $3.75 \times 10^{-04}$           | $3.00 \times 10^{-04}$            |
|                       |                       | 200    | $4.92 \times 10^{-04}$           | $3.94 \times 10^{-04}$            |
|                       |                       | 400    | $2.03 \times 10^{-03}$           | $1.62 \times 10^{-03}$            |
|                       |                       | 600    | $8.25 \times 10^{-04}$           | $6.60 \times 10^{-04}$            |
| <b>1a</b>             | <b>2b</b>             | 1      | $4.89 \times 10^{-03}$           | $3.91 \times 10^{-03}$            |
|                       |                       | 200    | $6.53 \times 10^{-03}$           | $5.22 \times 10^{-03}$            |
|                       |                       | 400    | $8.40 \times 10^{-03}$           | $6.72 \times 10^{-03}$            |
|                       |                       | 600    | $1.10 \times 10^{-02}$           | $8.80 \times 10^{-03}$            |
| <b>1b</b>             | <b>2b</b>             | 1      | $2.09 \times 10^{-04}$           | $1.67 \times 10^{-04}$            |
|                       |                       | 200    | $2.52 \times 10^{-04}$           | $2.02 \times 10^{-04}$            |
|                       |                       | 400    | $3.22 \times 10^{-04}$           | $2.57 \times 10^{-04}$            |
|                       |                       | 600    | $3.62 \times 10^{-04}$           | $2.89 \times 10^{-04}$            |
| <b>1c</b>             | <b>2b</b>             | 1      | $2.11 \times 10^{-05}$           | $1.69 \times 10^{-05}$            |
|                       |                       | 200    | $2.37 \times 10^{-05}$           | $1.90 \times 10^{-05}$            |
|                       |                       | 400    | $2.78 \times 10^{-05}$           | $2.22 \times 10^{-05}$            |
|                       |                       | 600    | $3.22 \times 10^{-05}$           | $2.57 \times 10^{-05}$            |
| <b>1a</b>             | <b>2c</b>             | 1      | $5.62 \times 10^{-05}$           | $4.49 \times 10^{-05}$            |
|                       |                       | 200    | $7.01 \times 10^{-05}$           | $5.61 \times 10^{-05}$            |
|                       |                       | 400    | $8.24 \times 10^{-05}$           | $6.59 \times 10^{-05}$            |
|                       |                       | 600    | $9.87 \times 10^{-05}$           | $7.89 \times 10^{-05}$            |
| <b>1b</b>             | <b>2c</b>             | 1      | $4.21 \times 10^{-05}$           | $3.37 \times 10^{-05}$            |
|                       |                       | 200    | $4.96 \times 10^{-05}$           | $3.97 \times 10^{-05}$            |
|                       |                       | 400    | $5.66 \times 10^{-05}$           | $4.53 \times 10^{-05}$            |
|                       |                       | 600    | $6.76 \times 10^{-05}$           | $5.41 \times 10^{-05}$            |
| <b>1c</b>             | <b>2c</b>             | 1      | $1.52 \times 10^{-07}$           | $1.21 \times 10^{-07}$            |
|                       |                       | --     | --                               | --                                |
|                       |                       | 600    | $2.17 \times 10^{-07}$           | $1.74 \times 10^{-07}$            |

<sup>a</sup> Upon mixing 0.125 M halonitrobenzene **1** and 1.25 M amine **2**

**Table 2** Rate constants and activation volumes for the base-catalyzed reaction of 1-fluoro-4-nitrobenzene (**1a**) with pyrrolidine (**2a**) and piperidine (**2b**)

| Amine     | [Amine]/M | P /bar                   | k/M <sup>-1</sup> s <sup>-1</sup> | $\Delta V^\ddagger/\text{cm}^3\text{mol}^{-1}$ | Amine     | [Amine]/M                | P/bar | k/M <sup>-1</sup> s <sup>-1</sup> | $\Delta V^\ddagger/\text{cm}^3\text{mol}^{-1}$ |       |
|-----------|-----------|--------------------------|-----------------------------------|------------------------------------------------|-----------|--------------------------|-------|-----------------------------------|------------------------------------------------|-------|
| <b>2a</b> | 1.2500    | 1                        | 1.123 x 10 <sup>-02</sup>         | -58.0                                          | <b>2b</b> | 1.2500                   | 1     | 3.91 x 10 <sup>-03</sup>          | -32.4                                          |       |
|           |           | 100                      | 1.424 x 10 <sup>-02</sup>         |                                                |           |                          | 200   | 5.22 x 10 <sup>-03</sup>          |                                                |       |
|           |           | 320                      | 2.591 x 10 <sup>-02</sup>         |                                                |           |                          | 400   | 6.72 x 10 <sup>-03</sup>          |                                                |       |
|           |           | 440                      | 3.086 x 10 <sup>-02</sup>         |                                                |           |                          | 600   | 8.80 x 10 <sup>-03</sup>          |                                                |       |
|           | 0.6250    | 1                        | 4.37 x 10 <sup>-03</sup>          | -59.1                                          |           | 0.6250                   | 1     | 1.95 x 10 <sup>-03</sup>          |                                                | -33.4 |
|           |           | 100                      | 5.36 x 10 <sup>-03</sup>          |                                                |           |                          | 200   | 2.50 x 10 <sup>-03</sup>          |                                                |       |
|           |           | 200                      | 7.15 x 10 <sup>-03</sup>          |                                                |           |                          | 400   | 3.35 x 10 <sup>-03</sup>          |                                                |       |
|           |           | 300                      | 8.94 x 10 <sup>-03</sup>          |                                                |           |                          | 600   | 4.43 x 10 <sup>-03</sup>          |                                                |       |
|           | 0.3125    | 1                        | 2.83 x 10 <sup>-03</sup>          | -58.1                                          |           | 0.3125                   | 1     | 1.11 x 10 <sup>-03</sup>          |                                                | -33.0 |
|           |           | 200                      | 4.94 x 10 <sup>-03</sup>          |                                                |           |                          | 200   | 1.44 x 10 <sup>-03</sup>          |                                                |       |
|           |           | 400                      | 7.23 x 10 <sup>-03</sup>          |                                                |           |                          | 400   | 1.84 x 10 <sup>-03</sup>          |                                                |       |
|           |           | 600                      | 1.20 x 10 <sup>-03</sup>          |                                                |           |                          | 600   | 2.54 x 10 <sup>-03</sup>          |                                                |       |
| 0.1563    | --        | --                       | -58.0                             | 0.0325                                         | 1         | 1.88 x 10 <sup>-04</sup> | -32.2 |                                   |                                                |       |
|           | 320       | 7.48 x 10 <sup>-04</sup> |                                   |                                                | 200       | 2.85 x 10 <sup>-04</sup> |       |                                   |                                                |       |
|           | 440       | 9.90 x 10 <sup>-04</sup> |                                   |                                                | 400       | 3.41 x 10 <sup>-04</sup> |       |                                   |                                                |       |
|           |           |                          |                                   |                                                | 600       | 4.14 x 10 <sup>-04</sup> |       |                                   |                                                |       |

<sup>a</sup> Concentration **1a** upon mixing 0.125 M
